# Supplementary material for: A simple and rapid technique for the determination of copper based on air-assisted liquid–liquid microextraction and image colorimetric analysis
Source: Royal Society of Chemistry journal article supplement (doi:10.1039/d0ay00706d), 2020-01-01
Supplement: d0ay00706d1.pdf [file d0ay00706d1.pdf]

## Supplementary Material for

### A simple and rapid technique for the determination of copper based on air-assisted liquid-liquid microextraction and image colorimetric analysis

Leila Khoshmaram<sup>a\*</sup>, Masoud Saadati<sup>b</sup>, Ali Karimi<sup>a</sup>

<sup>a</sup> Department of Chemistry, Faculty of Sciences, Azarbaijan Shahid Madani University, Tabriz, Iran

<sup>b</sup> Department of Science, Farhangian University, Tabriz, Iran

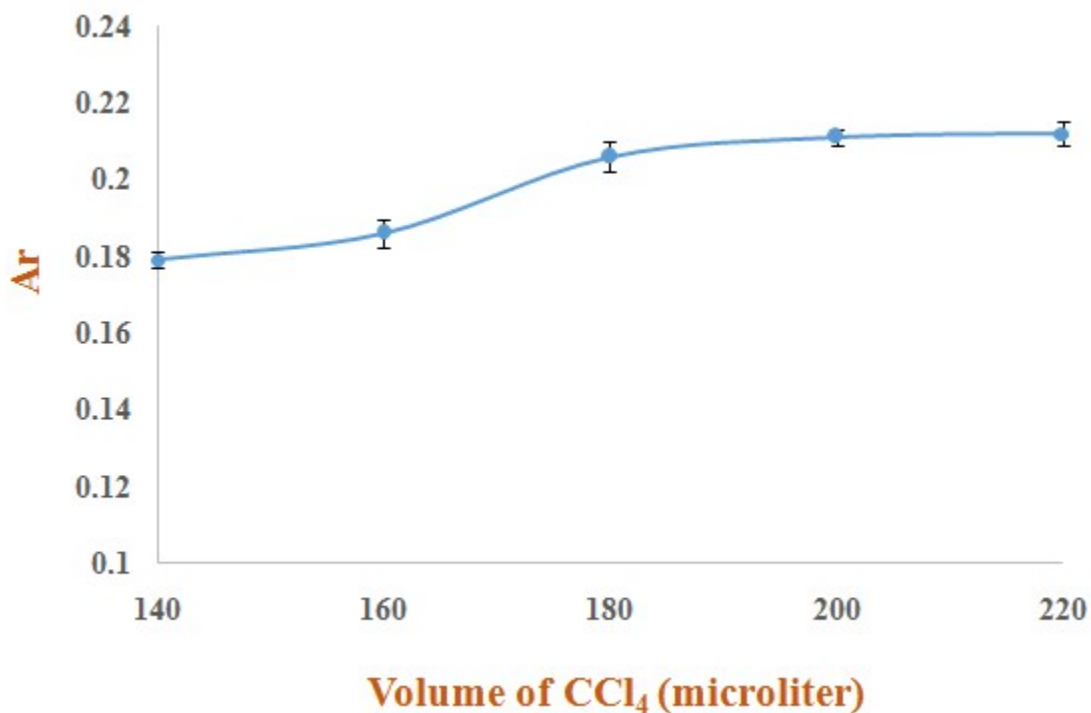

**Fig. 1s.** Effect of extraction solvent volume on the extraction efficiency. Extraction conditions: the same as Fig. 2.

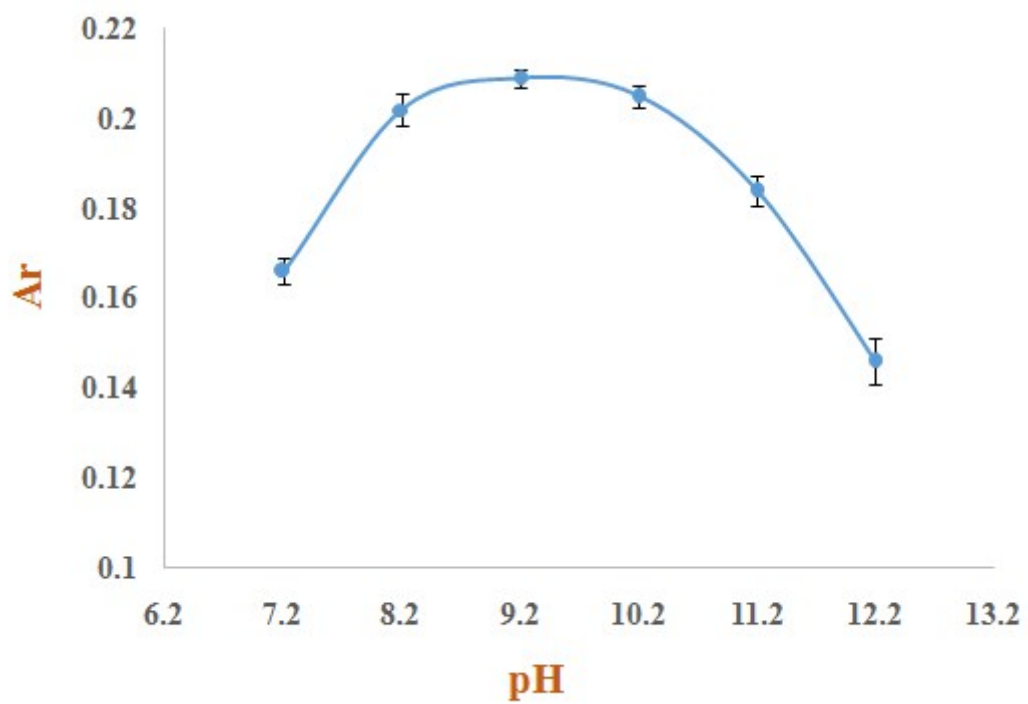

**Fig. 2s.** Effect of pH on the extraction efficiency. Extraction conditions: DDTC, 0.4% (w/v); Other conditions are the same as Fig. 3.

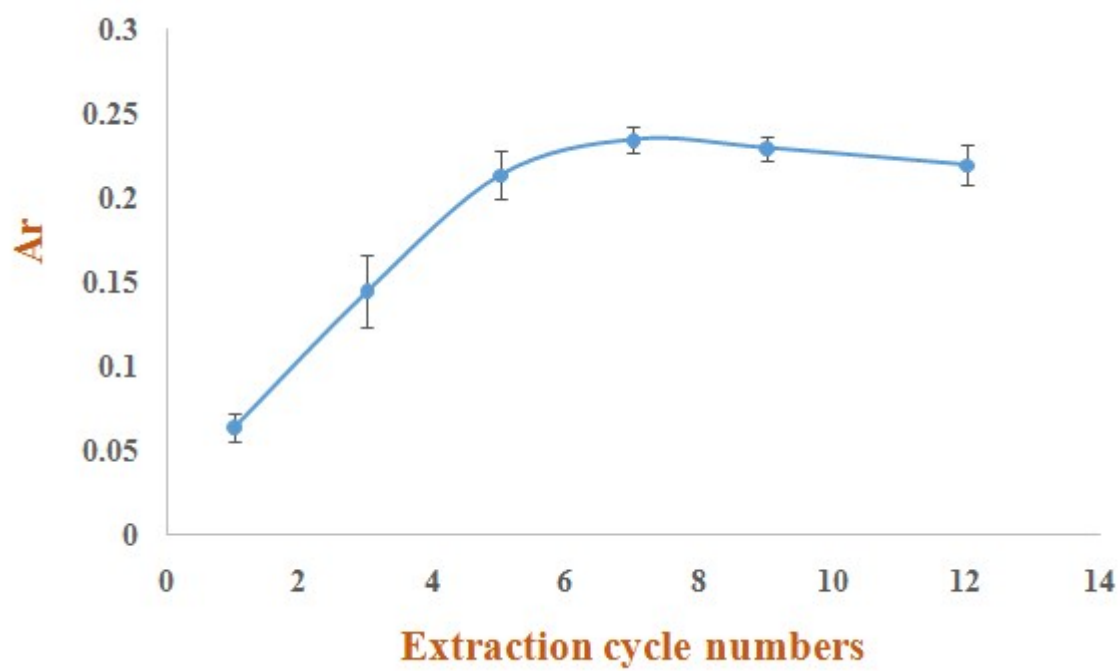

**Fig. 3s.** Effect of extraction cycle numbers on the extraction efficiency. Extraction conditions: extraction solvent, 200  $\mu\text{L}$   $\text{CCl}_4$ ; reaction time, 5 min; Other conditions are the same as Fig. 2.

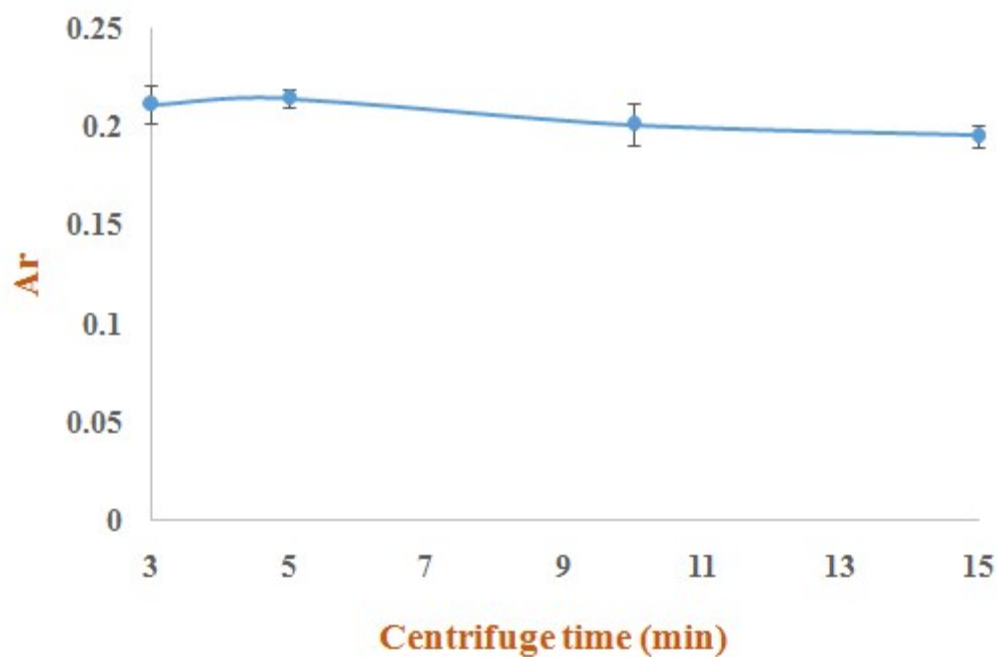

**Fig. 4s.** Effect of centrifuge time on the extraction efficiency. Extraction conditions: extraction solvent, 200  $\mu\text{L}$   $\text{CCl}_4$ ; DDTC, 0.4% (w/v); pH, 9.2; NaCl, 5% (w/v); reaction time, 5 min; extraction cycle numbers, 7; and centrifuging speed, 3000 rpm.

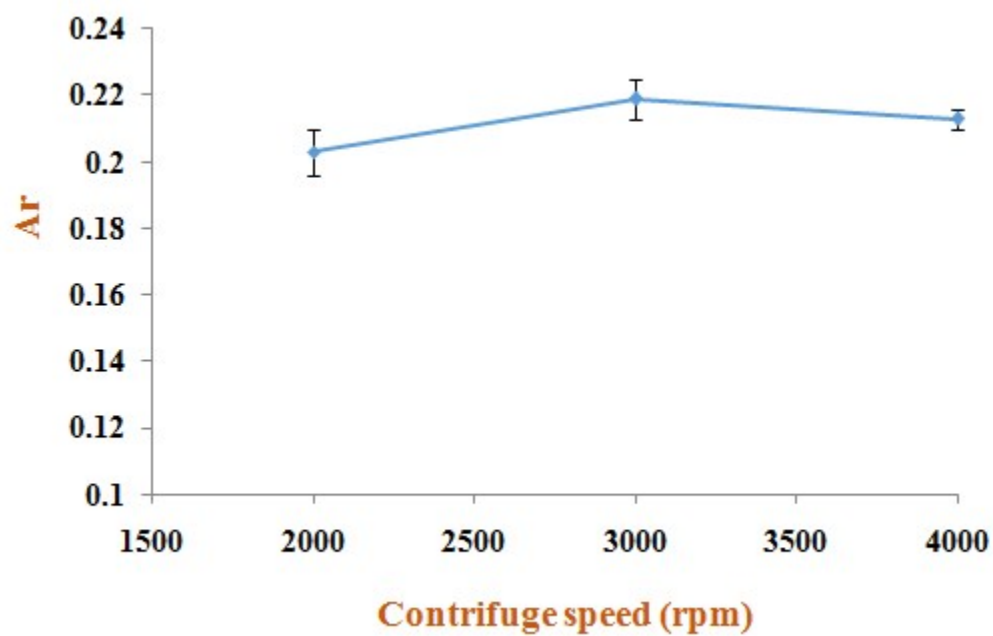

**Fig. 5s.** Effect of centrifuge speed on the extraction efficiency. Extraction conditions: centrifuging time, 5 min; Other conditions are the same as Fig. 4s.
